# Supplementary material
Source: HighWire-hosted journal article supplement (https://cmajopen-stage.highwire.org/highwire/filestream/88642/field_highwire_adjunct_files/3/open-2021-0195-4-at.pdf)
Supplement: open-2021-0195-4-at.pdf [file open-2021-0195-4-at.pdf]

**Appendix 4.** Up-to-date glucose testing rates among adults aged 40+ years in Ontario, by rostering to a primary care physician, 2010-2017\*

a. Men

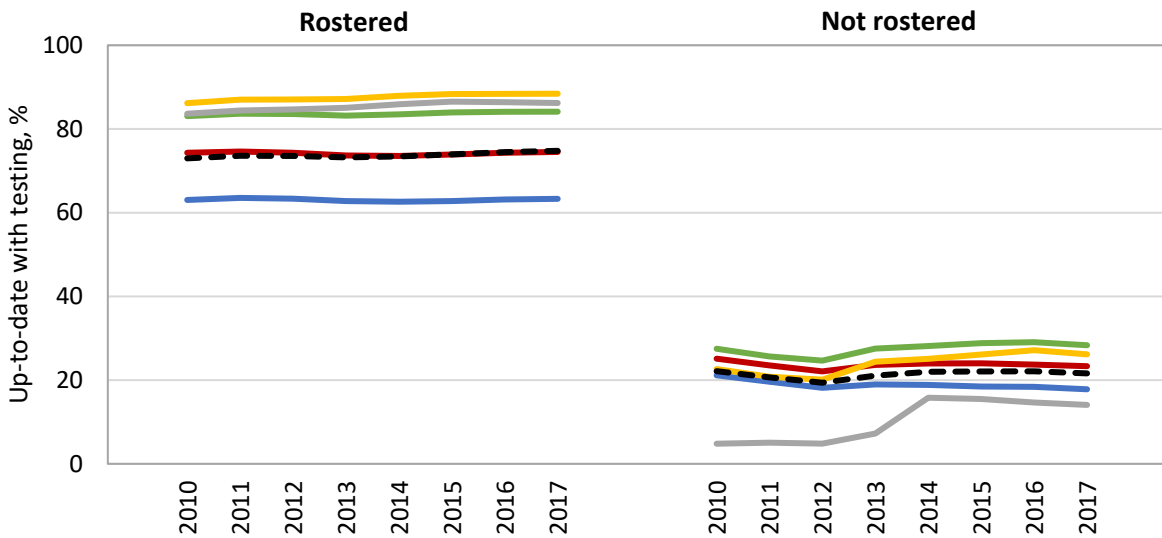

b. Women

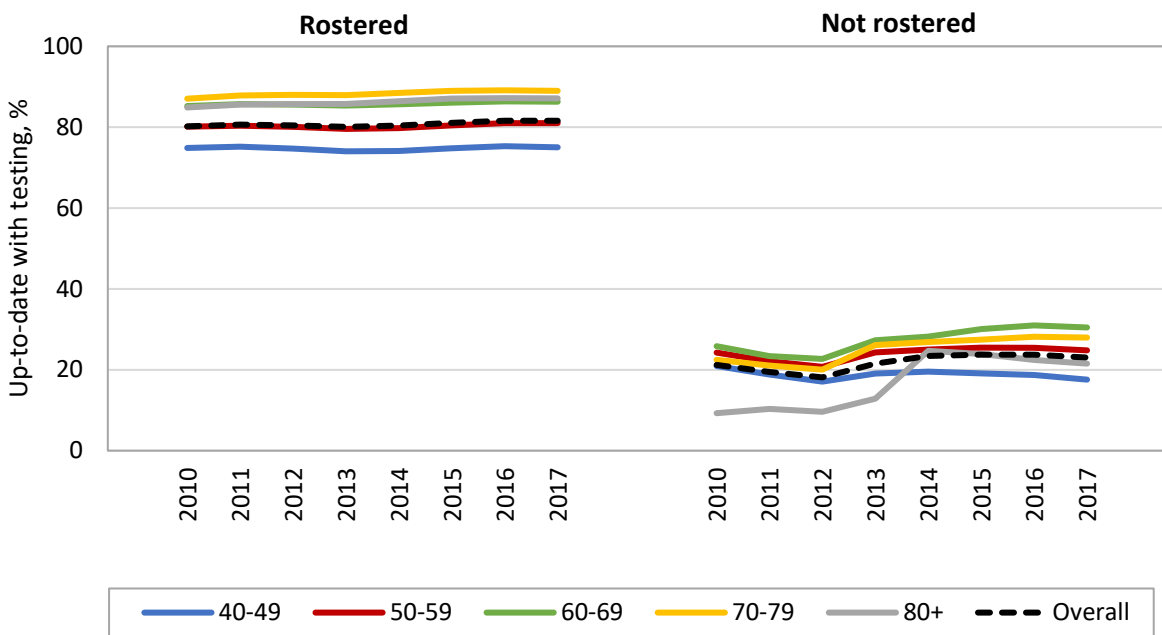

\* Defined as at least one HbA1c, plasma/serum glucose or oral glucose tolerance test in the prior three years, and excludes people diagnosed with diabetes prior to the study period.

† Includes individuals formally rostered with a primary care physician or who receive the majority of their primary care from a specific primary care physician (virtually rostered).
